# Supplementary material for: A patient-derived cellular model for Huntington’s disease reveals phenotypes at clinically relevant CAG lengths
Source: PubMed Central journal article supplement — Mol Biol Cell. 2018 Nov 15;29(23):2809–20. doi: 10.1091/mbc.E18-09-0590 (PMC6249865; doi:10.1091/mbc.e18-09-0590), 2018-11-15

# Supplemental Materials

*Molecular Biology of the Cell*

Hung et al.

## **A Patient-Derived Cellular Model for Huntington's Disease Reveals Phenotypes at Clinically Relevant CAG Lengths**

Claudia Lin-Kar Hung<sup>1</sup>, Tamara Maiuri<sup>1</sup>, Laura Erin Bowie<sup>1</sup>, Ryan Gotesman<sup>1</sup>, Susie Son<sup>1</sup>, Mina Falcone<sup>1</sup>, James Victor Giordano<sup>2,3</sup>, Tammy Gillis<sup>2,3</sup>, Virginia Mattis<sup>4</sup>, Trevor Lau<sup>1</sup>, Vickie Kwan<sup>1,5</sup>, Vanessa Wheeler<sup>2,3</sup>, Jonathan Schertzer<sup>1</sup>, Karun Singh<sup>1</sup>, \*Ray Truant<sup>1</sup>

<sup>1</sup>Department of Biochemistry and Biomedical Sciences, Faculty of Health Sciences, McMaster University, Hamilton, ON, Canada

<sup>2</sup>Center for Genomic Medicine, Massachusetts General Hospital, Harvard Medical School, Boston, MA, United States

<sup>3</sup>Department of Neurology, Massachusetts General Hospital, Harvard Medical School, Boston, MA, United States

<sup>4</sup>Cedars-Sinai Medical Center, Board of Governors Regenerative Medicine Institute, Los Angeles, CA, United States

<sup>5</sup>Stem Cell and Cancer Research Institute, Faculty of Health Sciences, McMaster University, Hamilton, ON, Canada

\*Corresponding Author: [truantr@mcmaster.ca](mailto:truantr@mcmaster.ca)

**Supplemental Figure 1:** (A) *STHdh*<sup>Q111/Q111</sup> example karyotype. “mar” denotes marker chromosomes, “+” are additional chromosomes and “-” are missing chromosomes. (B) Senescence-activated beta-galactosidase assay comparing primary-Q21Q18F and TruHD-Q21Q18F cells at ~80% confluency. Senescent cells present blue colour pseudocoloured in greyscale and indicated by black arrow. Scale bar =250µm. (C) TruHD-Q21Q18F plated at lower density (<40% confluency) showed presence of blue colour pseudocoloured in greyscale and indicated by black arrow. Scale bar =250µm. (D) TruHD-Q21Q18F cells at high density that were left to overgrow (100% confluency) showed presence of blue colour pseudocoloured in greyscale and indicated by black arrow, but not as much in TruHD-Q43Q17M. Scale bar =250µm. (E) TruHD-Q21Q18F karyotype of senescent cells showing tetraploidy in 2 of 22 cells analyzed.

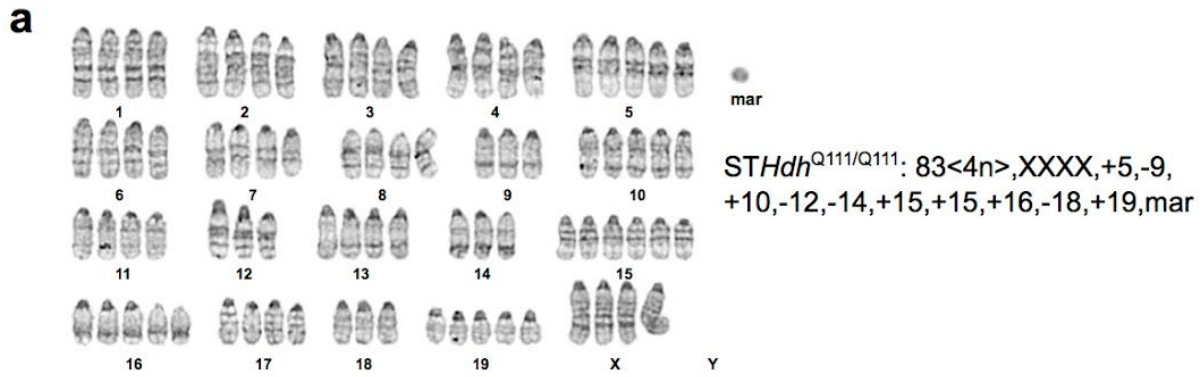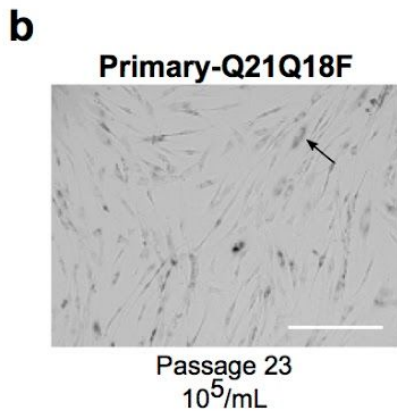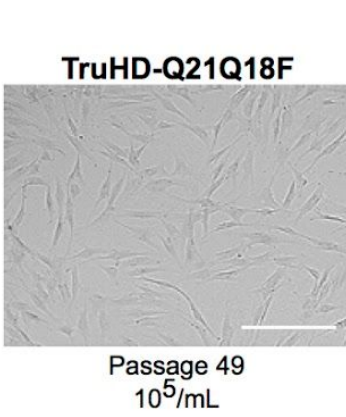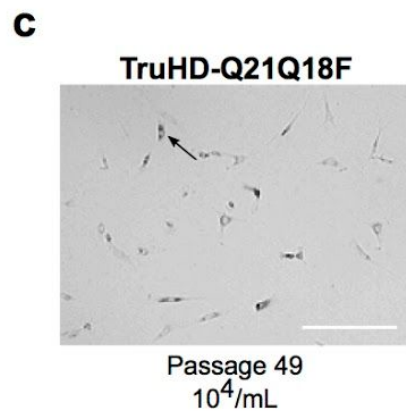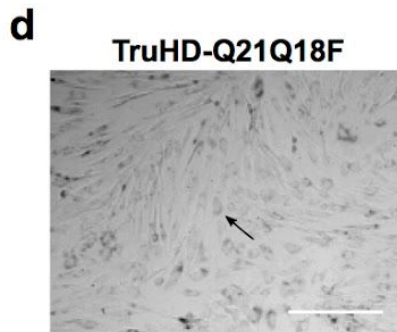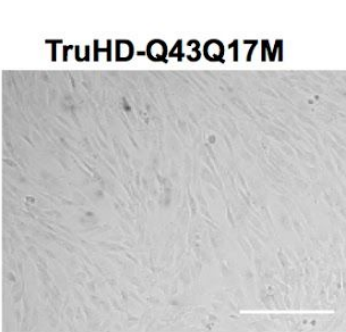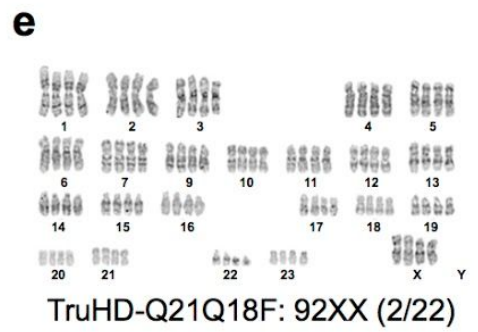

**Supplemental Figure 2:** (A) Individual PCA plots from Phenoripper comparing images of TruHD cell lines using only Hoechst (405nm), N17-phospho (488nm) and beta-tubulin (640nm) channels. (B) Dose response curves of TruHD cell lines to  $\text{KBrO}_3$ .  $n=3$ ,  $N>200$ . Error bars represent S.E.M. At 24 hours, \*\*\*\* $p<0.0001$  between 0mM and 10mM treatments in TruHD-Q43Q17M and TruHD-Q50Q40F cells by two-way ANOVA. (C) Normalized ADP/ATP ratio in *STHdh* cells at ~75 percent confluency 24 hours after seeding.  $n=3$ . Error bars represent S.E.M. \*\* $p=0.0014$ .

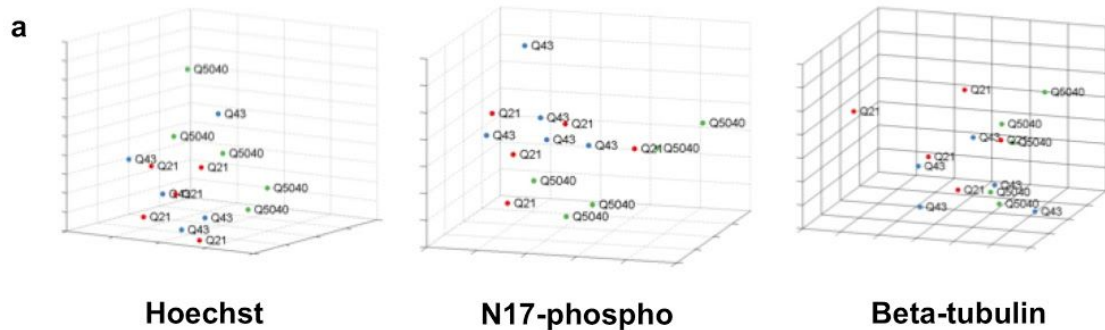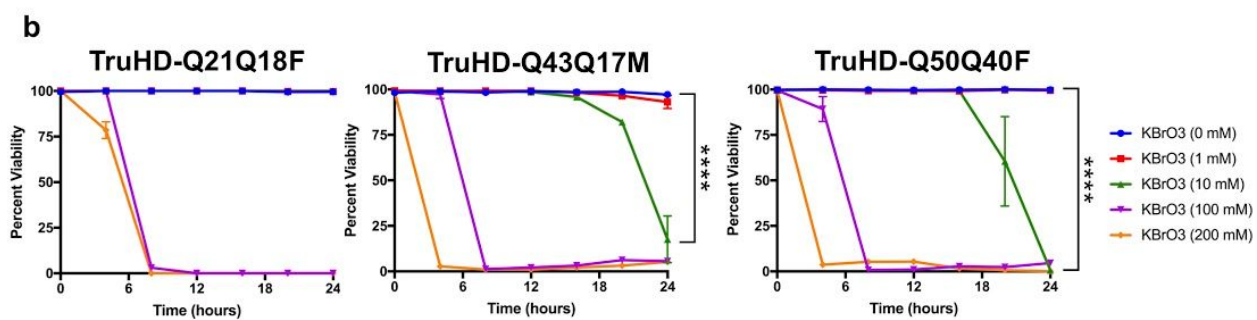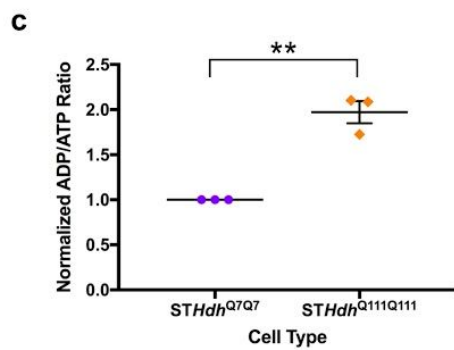

**Supplemental Figure 3:** N17-phospho antibody validation (A) Dot blot with N17 peptides. Unphosphorylated (N17), phosphorylated on serine 13 only (N17 S13p), phosphorylated on serine 16 only (N17 S16p) and phosphorylated on both serines 13 and 16 (N17 S13pS16p). (B) Huntingtin knock-down showing N17-phospho antibody specificity compared to the commercially available total huntingtin antibody EPR5526. Immunoblots were cut horizontally at 75 kDa marker so that GAPDH loading control was probed for separately. \*\* $p=0.0035$  for N17-phospho and \*\* $p=0.0031$  for EPR5526. (C) Peptide competition assay with N17 peptides and non-specific TP53 peptide. Scale bar = 20 $\mu$ m.

**a**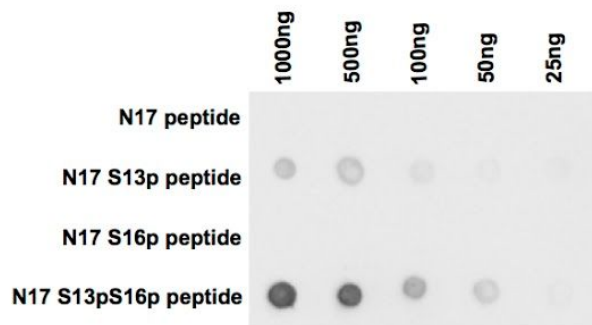**b**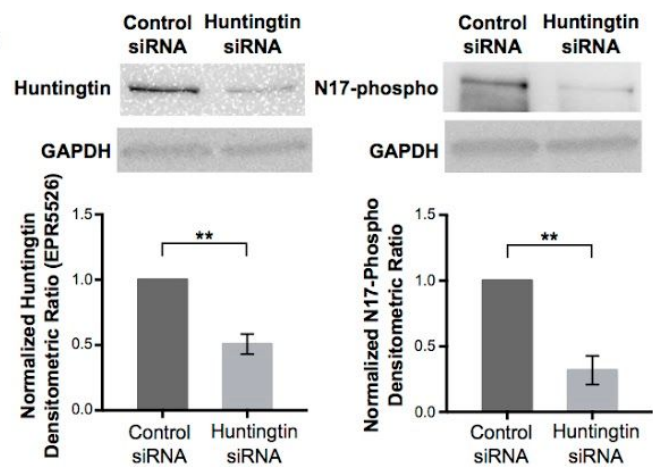**c**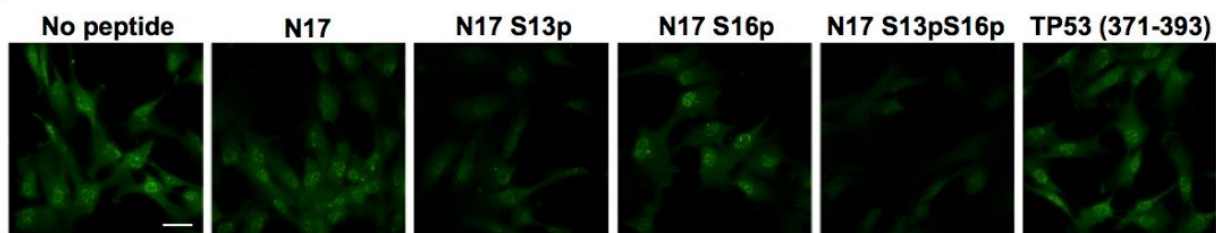



**Supplemental Figure 4:** Full huntingtin immunoblots from Figure 3. (A) Huntingtin immunoblot with EPR5526 antibody. Samples were loaded in duplicate. Gel was cut horizontally at 75 kDa marker and blots were probed with EPR5526 or GAPDH antibody. Red, dashed-boxes denotes cropped region used for main figure. (B) Huntingtin immunoblot with mAb2166 antibody. Gel was cut horizontally at 75 kDa marker and blots were probed with mAb2166 or GAPDH antibody. Red, dashed-boxes denotes cropped region used for main figure. (C) Phospho-huntingtin immunoblot with N17-Phospho antibody. Samples were loaded in duplicate. Gel was cut horizontally at 75 kDa marker and blots were probed with EPR5526 or GAPDH antibody. Two main bands were visible (at ~350 kDa and ~220 kDa). Red, dashed-box denotes cropped region used for main figure.

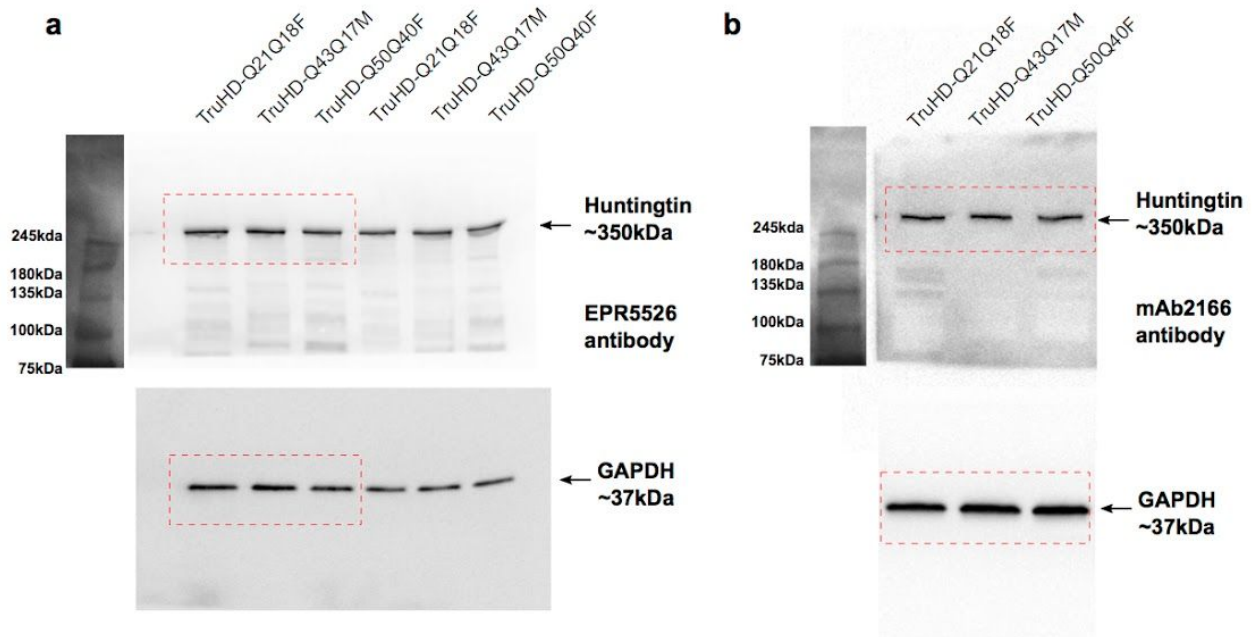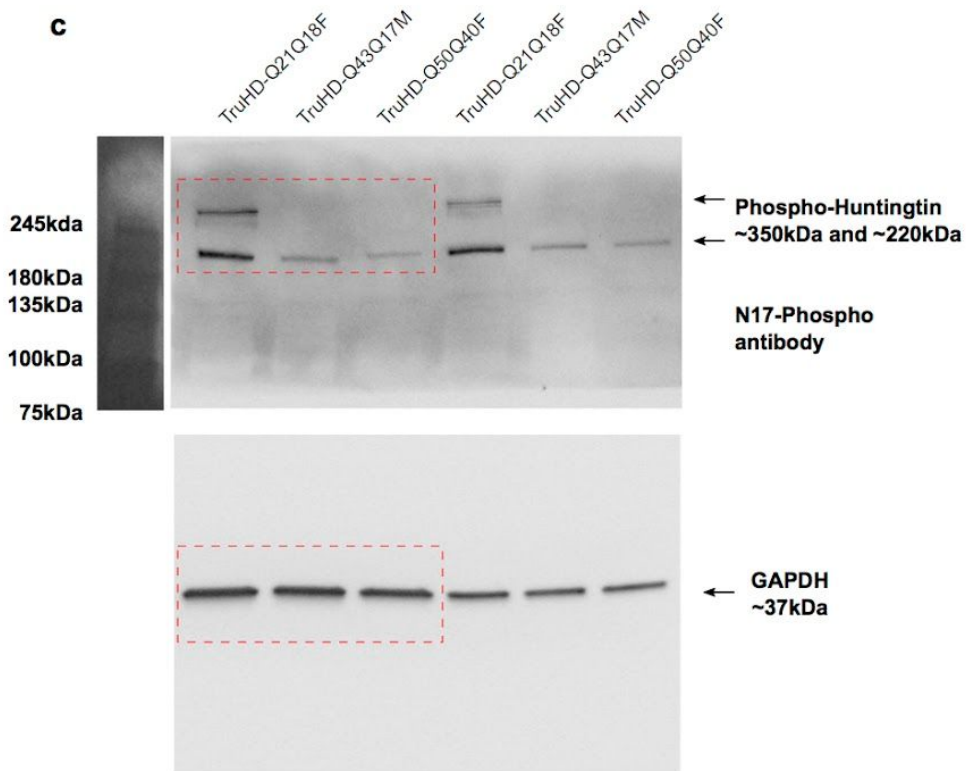

Supplement: mbc-29-2809-s001.pdf [file mbc-29-2809-s001.pdf]
